# Supplementary material for: Synthesis and structures of mono- and di-nuclear aluminium and zinc complexes bearing α-diimine and related ligands, and their use in the ring opening polymerization of cyclic esters
Source: Royal Society of Chemistry journal article supplement (doi:10.1039/c9dt04332b), 2019-12-30
Supplement: c9dt04332b1.pdf [file c9dt04332b1.pdf]

## Electronic Supplementary Information

### Synthesis and structures of mono- and di-nuclear aluminium and zinc complexes bearing $\alpha$ -diimine and related ligands, and their use in the ring opening polymerization of cyclic esters

Lin Xiao,<sup>a</sup> Yanxia Zhao,<sup>a\*</sup> Sijie Qiao,<sup>a</sup> Ziyue Sun,<sup>a</sup> Orlando Santoro<sup>b</sup> and Carl Redshaw<sup>a,b\*</sup>

<sup>a</sup> College of Chemistry and Material Science, Northwest University, 710069 Xi'an, China

<sup>b</sup> Department of Chemistry & Biochemistry, The University of Hull, Cottingham Rd, Hull, HU6 7RX, U.K.

#### Contents

**Chart S1.** Imine-based frameworks utilized in bi-nickel-based olefin polymerization chemistry

**Scheme S1.** Synthesis of the ligands  $L^{iPr-NO}$ ,  $L^{Et-NO}$  and  $L^{ipr-N4}$ .

**Figure S1.** Molecular structure of  $L^{iPr-N4}$

**Figure S2.** The molecular structure of  $L^{iPr-N2-ArCH2Ar-N2}$

**Figure S3.** The molecular structure of **1** (left), **3** (right) (thermal ellipsoids are set at the 20% probability level; H atoms are omitted for clarity).

**Figure S4.** Optimized structures of **4** and its isomers **4a** and **4b**.

**Table S1.** Relative energies of compounds **4**, **4a** and **4b**.

**Table S2.** Crystallographic data and refinement details for compounds  $L^{iPr-N4}$ , **1–3**.

**Table S3.** Crystallographic data and refinement details for compounds **4–7**.

**Table S4.** Crystallographic data and refinement details for compounds  $L^{iPr-N2-ArCH2Ar-N2}$  and **8**.

**Figure S5.** <sup>1</sup>H NMR (400 MHz CDCl<sub>3</sub> 298K) spectrum for ligand  $L^{iPr-NO}$ .

**Figure S6.** <sup>13</sup>C NMR (100.6 MHz CDCl<sub>3</sub> 298K) spectrum for ligand  $L^{iPr-NO}$ .

**Figure S7.**  $^1\text{H}$  NMR (400 MHz DMSO 298K) spectrum for ligand  $\text{L}^{\text{Et-NO}}$ .

**Figure S8.**  $^{13}\text{C}$  NMR (100.6 MHz  $\text{CDCl}_3$  298K) spectrum for ligand  $\text{L}^{\text{Et-NO}}$ .

**Figure S9.**  $^1\text{H}$  NMR (400 MHz  $\text{CDCl}_3$  298K) spectrum for ligand  $\text{L}^{\text{iPr-N4}}$ .

**Figure S10.**  $^{13}\text{C}$  NMR (100.6 MHz  $\text{CDCl}_3$  298K) spectrum for ligand  $\text{L}^{\text{iPr-N4}}$ .

**Figure S11.**  $^{13}\text{H}$  NMR (400 MHz  $\text{CDCl}_3$  298K) spectrum for ligand  $\text{L}^{\text{iPr-N2-ArCH2Ar-N2}}$ .

**Figure S12.**  $^{13}\text{C}$  NMR (100.6 MHz  $\text{CDCl}_3$  298K) spectrum for ligand  $\text{L}^{\text{iPr-N2-ArCH2Ar-N2}}$ .

**Figure S13.**  $^1\text{H}$  NMR (400 MHz  $\text{CDCl}_3$  298K) spectrum for compound **1**.

**Figure S14.**  $^{13}\text{C}$  NMR (100.6 MHz  $\text{CDCl}_3$  298K) spectrum for compound **1**.

**Figure S15.**  $^1\text{H}$  NMR (400 MHz  $\text{CDCl}_3$  298K) spectrum for compound **2**.

**Figure S16.**  $^{13}\text{C}$  NMR (100.6 MHz  $\text{CDCl}_3$  298K) spectrum for compound **2**.

**Figure S17.**  $^1\text{H}$  NMR (400 MHz  $\text{CDCl}_3$  298K) spectrum for compound **3**.

**Figure S18.**  $^{13}\text{C}$  NMR (100.6 MHz  $\text{CDCl}_3$  298K) spectrum for compound **3**.

**Figure S19.**  $^1\text{H}$  NMR (400 MHz  $\text{CDCl}_3$  298K) spectrum for compound **4**.

**Figure S20.**  $^{13}\text{C}$  NMR (100.6 MHz  $\text{CDCl}_3$  298K) spectrum for compound **4**.

**Figure S21.**  $^1\text{H}$  NMR (400 MHz  $\text{THF-d}_8$  298K) spectrum for compound **5**.

**Figure S22.**  $^{13}\text{C}$  NMR (100.6 MHz  $\text{THF-d}_8$  298K) spectrum for compound **5**.

**Figure S23.**  $^1\text{H}$  NMR (400 MHz  $\text{CDCl}_3$  298K) spectrum for compound **6**.

**Figure S24.**  $^{13}\text{C}$  NMR (100.6 MHz  $\text{CDCl}_3$  298K) spectrum for compound **6**.

**Figure S25.**  $^1\text{H}$  NMR (400 MHz  $\text{CDCl}_3$  298K) spectrum for compound **7**.

**Figure S26.**  $^{13}\text{C}$  NMR (100.6 MHz  $\text{CDCl}_3$  298K) spectrum for compound **7**.

**Figure S27.**  $^{13}\text{H}$  NMR (400 MHz  $\text{CDCl}_3$  298K) spectrum for compound **8**.

**Figure S28.**  $^{13}\text{C}$  NMR (100.6 MHz  $\text{CDCl}_3$  298K) spectrum for compound **8**.

**Figure S29.** 2D J-resolved  $^1\text{H}$  NMR ( $\text{CDCl}_3$ , 400 MHz, 298 K) spectrum of the PLA synthesized with **6** at 80 °C (Table 6, entry 2).

**Figure S30.** 2D J-resolved  $^1\text{H}$  NMR ( $\text{CDCl}_3$ , 400 MHz, 298 K) spectrum of the PLA synthesized with **7** at 30 °C (Table 6, entry 3).

**Figure S31.** 2D J-resolved  $^1\text{H}$  NMR ( $\text{CDCl}_3$ , 400 MHz, 298 K) spectrum of the PLA synthesized with **7** at 80 °C (Table 6, entry 4).

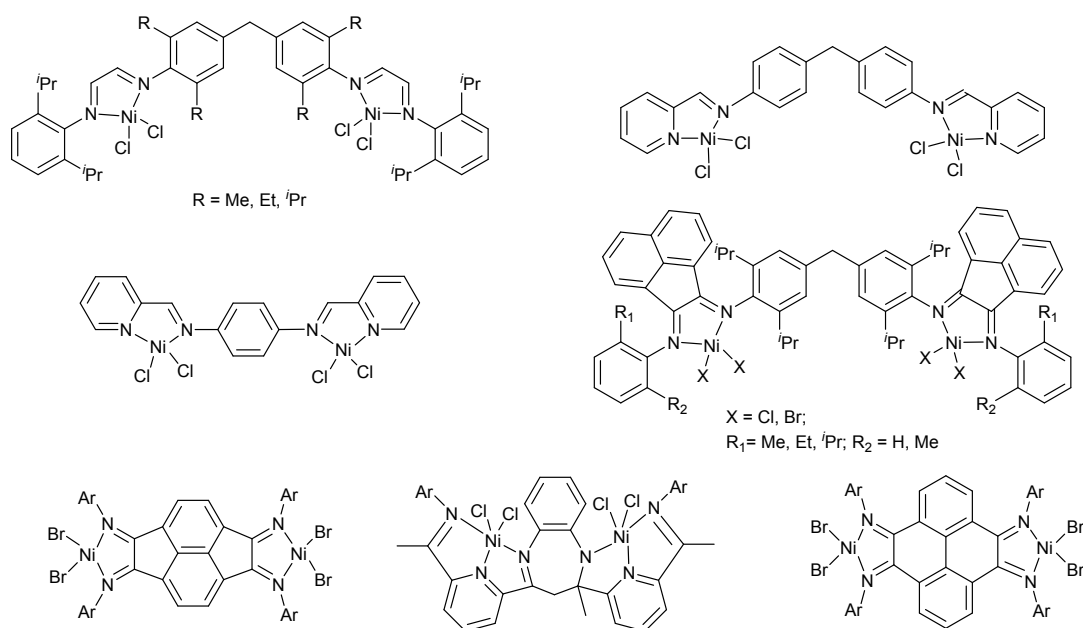

**Chart S1.** Imine-based frameworks utilized in bi-nickel-based olefin polymerization chemistry. [1]

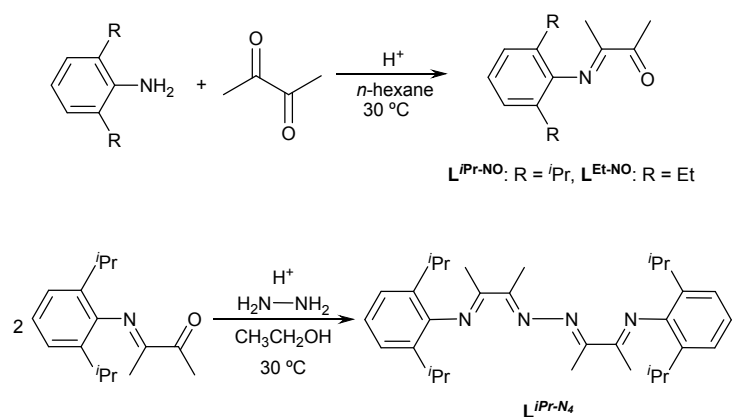

**Scheme S1.** Synthesis of the ligands  $\text{L}^{i\text{Pr-NO}}$ ,  $\text{L}^{\text{Et-NO}}$  and  $\text{L}^{i\text{Pr-N}_4}$ .

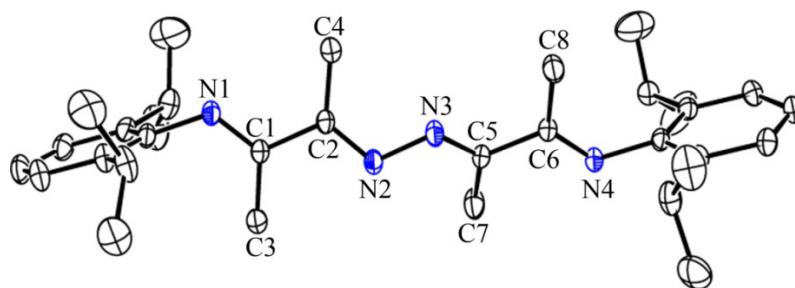

**Figure S1.** The molecular structure of  $\text{L}^{i\text{Pr-N}_4}$  (thermal ellipsoids are set at the 20% probability level; H atoms are omitted for clarity): C1–N1 1.269(3), C1–C2 1.498(3), C1–C3 1.497(4), C2–N2 1.277(3), C2–C4 1.483(4), N2–N3 1.405(3), C5–N3 1.279(3), C5–C7 1.479(4), C5–C6 1.496(3), C6–N4 1.274(3), C6–C8 1.496(4); N1–C1–C2 116.0(2), C1–C2–N2 115.6(2), C2–N2–N3 115.2(2), N2–C3–N5 114.7(2), N3–C5–C6 115.6(2), C5–C6–N4 116.2(2).

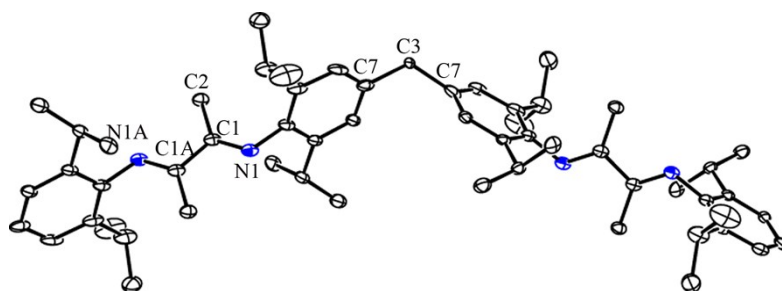

**Figure S2.** The molecular structure of  $L^{iPr-N_2-ArCH_2Ar-N_2}$  (thermal ellipsoids are set at the 20% probability level; H atoms are omitted for clarity): C1–N1 1.291(4), C1–C2 1.505(4), C1–C1A 1.518(4), N1–C1–C2 126.5(3), N1–C1–C1 116.4(4), C2–C1–C1 117.1(4), C7–C3–C7 121.7(5).

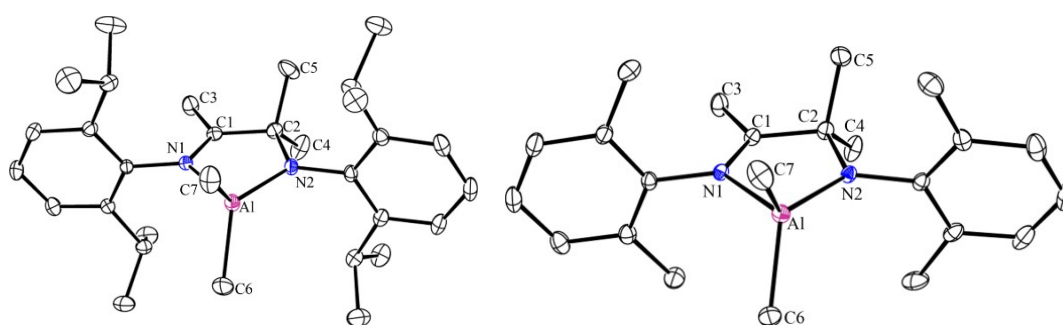

**Figure S3.** The molecular structure of **1** (left), **3** (right) (thermal ellipsoids are set at the 20% probability level; H atoms are omitted for clarity).

### Theoretical Calculations

Structure optimization for the model compounds  $[ArN-C(Me)_2C(Me)=NAlMe_2]_2$  (**4**) and its isomers **4a** and **4b**, were carried out at the DFT (B3LYP) level with a 6-31G\*<sup>2,3</sup> basis set using the Gaussian 09 program.<sup>4</sup> Figure S4 shows the optimized geometries. Here DFT results show that **4** exhibits a slightly lower energy than the imino-amido isomer **4a** ( $\Delta E = 18.0 \text{ kJ mol}^{-1}$ ) and **4b** ( $30.3 \text{ kJ mol}^{-1}$ ).

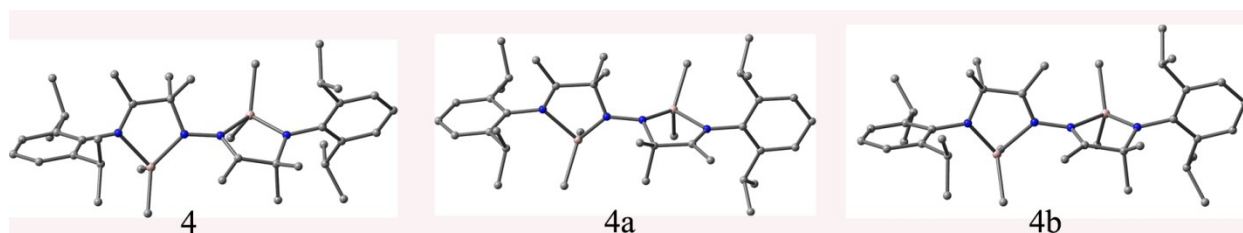

**Figure S4.** Optimized structures of **4** and its isomers **4a** and **4b**.

**Table S1.** Relative energies of compounds **4** and **4a** and **4b**.

| Compound | Energy (E, a.u.) | $\Delta E$<br>(kJ/mol) |
|----------|------------------|------------------------|
| 4        | -2190.58568031   | 0                      |
| 4a       | -2190.57882952   | 18.0                   |
| 4b       | -2190.57413253   | 30.3                   |

**Table S2.** Crystallographic data and refinement details for compounds  $L^{iPr-N4}$ , **1–3**.

| Compound                             | $L^{iPr-N4}$      | <b>1</b>            | <b>2</b>            | <b>3</b>               |
|--------------------------------------|-------------------|---------------------|---------------------|------------------------|
| Empirical formula                    | $C_{32}H_{46}N_4$ | $C_{31}H_{49}AlN_2$ | $C_{27}H_{41}AlN_2$ | $2^*C_{23}H_{33}AlN_2$ |
| Fw                                   | 486.73            | 476.70              | 420.60              | 728.98                 |
| Crystal system                       | Triclinic         | Triclinic           | monoclinic          | monoclinic             |
| Space group                          | $P-1$             | $P-1$               | Cc                  | $P2_1/c$               |
| $a / \text{\AA}$                     | 10.030(4)         | 8.4984(18)          | 9.425(2)            | 14.239(13)             |
| $b / \text{\AA}$                     | 12.557(4)         | 9.799(2)            | 37.074(9)           | 8.148(3)               |
| $c / \text{\AA}$                     | 13.499(5)         | 19.426(4)           | 8.102(2)            | 38.13(2)               |
| $\alpha / ^\circ$                    | 66.078(4)         | 82.115(3)           | 90                  | 90                     |
| $\beta / ^\circ$                     | 84.299(5)         | 80.860(2)           | 111.579(3)          | 91.22(3)               |
| $\gamma / ^\circ$                    | 82.021(5)         | 69.630(2)           | 90                  | 90                     |
| $V / \text{\AA}^3$                   | 1537.3(9)         | 1491.4(5)           | 2632.9(11)          | 4423(5)                |
| Z                                    | 2                 | 2                   | 4                   | 4                      |
| $D_{\text{calc}} / \text{g cm}^{-3}$ | 1.051             | 1.062               | 1.061               | 1.095                  |
| $F(000)$                             | 532               | 524                 | 920                 | 1584                   |
| $\mu / \text{mm}^{-1}$               | 0.062             | 0.088               | 0.092               | 0.100                  |
| $\theta$ range                       | 1.785–24.970      | 2.132–24.997        | 2.197–24.958        | 2.719–25.242           |
| Reflns collected                     | 9657              | 9538                | 8102                | 21974                  |
| Independent reflns                   | 5712              | 5095                | 8102                | 7701                   |
| Reflns [ $I > 2\sigma(I)$ ]          | 3705              | 3943                | 7632                | 5035                   |
| $R_{\text{int}}$                     | 0.0326            | 0.0255              | 0.0285              | 0.0705                 |
| $R_1; wR_2$ [ $I > 2\sigma(I)$ ]     | 0.0746; 0.1580    | 0.0608; 0.1741      | 0.0396; 0.1134      | 0.0589; 0.1038         |
| $R_1; wR_2$ (all data)               | 0.0981; 0.1694    | 0.0782; 0.1873      | 0.0426; 0.1163      | 0.1043; 0.1256         |
| GOF ( $F^2$ )                        | 1.042             | 1.155               | 1.023               | 1.121                  |

**Table S3.** Crystallographic data and refinement details for compounds 4–7.

| Compound                                                                             | 4                                                              | 5                                                                             | 6                                                | 7·0.5toluene                                                                                  |
|--------------------------------------------------------------------------------------|----------------------------------------------------------------|-------------------------------------------------------------------------------|--------------------------------------------------|-----------------------------------------------------------------------------------------------|
| Empirical formula                                                                    | C <sub>38</sub> H <sub>64</sub> Al <sub>2</sub> N <sub>4</sub> | C <sub>34</sub> H <sub>56</sub> Al <sub>2</sub> N <sub>2</sub> O <sub>2</sub> | C <sub>32</sub> H <sub>50</sub> ZnN <sub>2</sub> | C <sub>54</sub> H <sub>83</sub> Zn <sub>3</sub> N <sub>3</sub> O <sub>3</sub> •<br>0.5toluene |
| Fw                                                                                   | 630.89                                                         | 578.76                                                                        | 528.11                                           | 1064.49                                                                                       |
| Crystal system                                                                       | Monoclinic                                                     | Monoclinic                                                                    | monoclinic                                       | Orthorhombic                                                                                  |
| Space group                                                                          | P21/c                                                          | <i>P</i> 2 <sub>1</sub> / <i>n</i>                                            | <i>P</i> 2 <sub>1</sub> / <i>c</i>               | Pca21                                                                                         |
| <i>a</i> /Å                                                                          | 13.900(5)                                                      | 8.505(3)                                                                      | 8.5697(19)                                       | 28.2584(16)                                                                                   |
| <i>b</i> /Å                                                                          | 18.370(6)                                                      | 13.440(5)                                                                     | 19.226(4)                                        | 15.9307(9)                                                                                    |
| <i>c</i> /Å                                                                          | 16.078(6)                                                      | 14.919(7)                                                                     | 18.509(4)                                        | 13.3344(6)                                                                                    |
| $\alpha$ /°                                                                          | 90                                                             | 90                                                                            | 90                                               | 90                                                                                            |
| $\beta$ /°                                                                           | 106.950(14)                                                    | 94.584(13)                                                                    | 93.238(8)                                        | 90                                                                                            |
| $\gamma$ /°                                                                          | 90                                                             | 90                                                                            | 90                                               | 90                                                                                            |
| <i>V</i> /Å <sup>3</sup>                                                             | 3927(2)                                                        | 1699.8(11)                                                                    | 3044.6(11)                                       | 6002.8(6)                                                                                     |
| <i>Z</i>                                                                             | 4                                                              | 2                                                                             | 4                                                | 4                                                                                             |
| <i>D</i> <sub>calc</sub> /g cm <sup>-3</sup>                                         | 1.067                                                          | 1.131                                                                         | 1.152                                            | 1.127                                                                                         |
| <i>F</i> (000)                                                                       | 1384                                                           | 632                                                                           | 1144                                             | 2168                                                                                          |
| $\mu$ /mm <sup>-1</sup>                                                              | 0.103                                                          | 0.116                                                                         | 0.827                                            | 1.227                                                                                         |
| $\theta$ range                                                                       | 1.727–24.997                                                   | 2.669–25.342                                                                  | 2.388 – 26.364                                   | 2.459–26.389                                                                                  |
| Reflns collected                                                                     | 37227                                                          | 18303                                                                         | 17326                                            | 39300                                                                                         |
| Independent reflns                                                                   | 6900                                                           | 3091                                                                          | 6030                                             | 11494                                                                                         |
| Reflns [ <i>I</i> > 2 $\sigma$ ( <i>I</i> )]                                         | 5479                                                           | 2722                                                                          | 322                                              | 9673                                                                                          |
| <i>R</i> <sub>int</sub>                                                              | 0.0720                                                         | 0.0285                                                                        | 0.0351                                           | 0.0485                                                                                        |
| <i>R</i> <sub>1</sub> ; <i>wR</i> <sub>2</sub> [ <i>I</i> > 2 $\sigma$ ( <i>I</i> )] | 0.0714; 0.2088                                                 | 0.0330; 0.0731                                                                | 0.0518; 0.1020                                   | 0.0399; 0.0749                                                                                |
| <i>R</i> <sub>1</sub> ; <i>wR</i> <sub>2</sub> (all data)                            | 0.0877; 0.2088                                                 | 0.0394; 0.0770                                                                | 0.0696; 0.1093                                   | 0.0527; 0.0796                                                                                |
| GOF ( <i>F</i> <sup>2</sup> )                                                        | 1.005                                                          | 1.029                                                                         | 1.130                                            | 1.038                                                                                         |

**Table S4.** Crystallographic data and refinement details for compounds **L<sup>i</sup>Pr-N<sub>2</sub>-ArCH<sub>2</sub>Ar-N<sub>2</sub>** and **8**.

| Compound                                                                    | <b>L<sup>i</sup>Pr-N<sub>2</sub>-ArCH<sub>2</sub>Ar-N<sub>2</sub></b> | <b>8</b> ·3.5toluene                                                                           |
|-----------------------------------------------------------------------------|-----------------------------------------------------------------------|------------------------------------------------------------------------------------------------|
| Empirical formula                                                           | C <sub>57</sub> H <sub>80</sub> N <sub>4</sub>                        | C <sub>57</sub> H <sub>80</sub> Cl <sub>4</sub> N <sub>4</sub> Zn <sub>2</sub> ·3.5<br>toluene |
| Fw                                                                          | 821.25                                                                | 1410.59                                                                                        |
| Crystal system                                                              | monoclinic                                                            | monoclinic                                                                                     |
| Space group                                                                 | C2/c                                                                  | P21/n                                                                                          |
| <i>a</i> /Å                                                                 | 16.4092(9)                                                            | 13.65(3)                                                                                       |
| <i>b</i> /Å                                                                 | 9.5095(9)                                                             | 25.08(5)                                                                                       |
| <i>c</i> /Å                                                                 | 17.0073(10)                                                           | 24.33(5)                                                                                       |
| <i>α</i> /°                                                                 | 90                                                                    | 90                                                                                             |
| <i>β</i> /°                                                                 | 108.349(3)                                                            | 92.47(7)                                                                                       |
| <i>γ</i> /°                                                                 | 90                                                                    | 90                                                                                             |
| <i>V</i> /Å <sup>3</sup>                                                    | 2518.9(3)                                                             | 8319(31)                                                                                       |
| <i>Z</i>                                                                    | 2                                                                     | 4                                                                                              |
| <i>D</i> <sub>cal</sub> /g cm <sup>-3</sup>                                 | 1.083                                                                 | 0.873                                                                                          |
| <i>F</i> (000)                                                              | 900                                                                   | 2312                                                                                           |
| <i>μ</i> /mm <sup>-1</sup>                                                  | 0.062                                                                 | 0.732                                                                                          |
| <i>θ</i> range                                                              | 2.51–25.10                                                            | 2.32–21.79                                                                                     |
| Reflns collected                                                            | 10737                                                                 | 14853                                                                                          |
| Independent reflns                                                          | 5944                                                                  | 9937                                                                                           |
| Reflns [ <i>I</i> > 2σ( <i>I</i> )]                                         | 1603                                                                  | 7649                                                                                           |
| <i>R</i> <sub>int</sub>                                                     | 0.0463                                                                | 0.0819                                                                                         |
| <i>R</i> <sub>1</sub> ; <i>wR</i> <sub>2</sub> [ <i>I</i> > 2σ( <i>I</i> )] | 0.0936; 0.1672                                                        | 0.0740; 0.1906                                                                                 |
| <i>R</i> <sub>1</sub> ; <i>wR</i> <sub>2</sub> (all data)                   | 0.1268; 0.1849                                                        | 0.1308; 0.2107                                                                                 |
| GOF ( <i>F</i> <sup>2</sup> )                                               | 1.058                                                                 | 1.024                                                                                          |



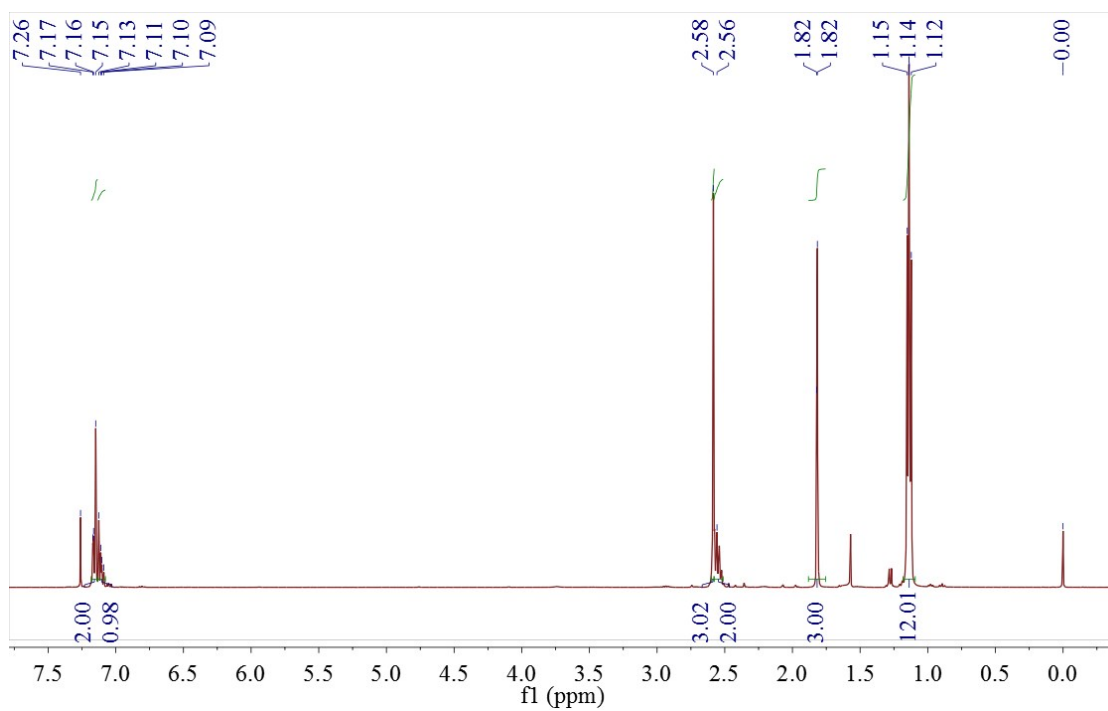

**Figure S5.**  $^1\text{H}$  NMR (400 MHz  $\text{CDCl}_3$  298K) spectrum for ligand  $\text{L}^{\text{iPr-NO}}$ .

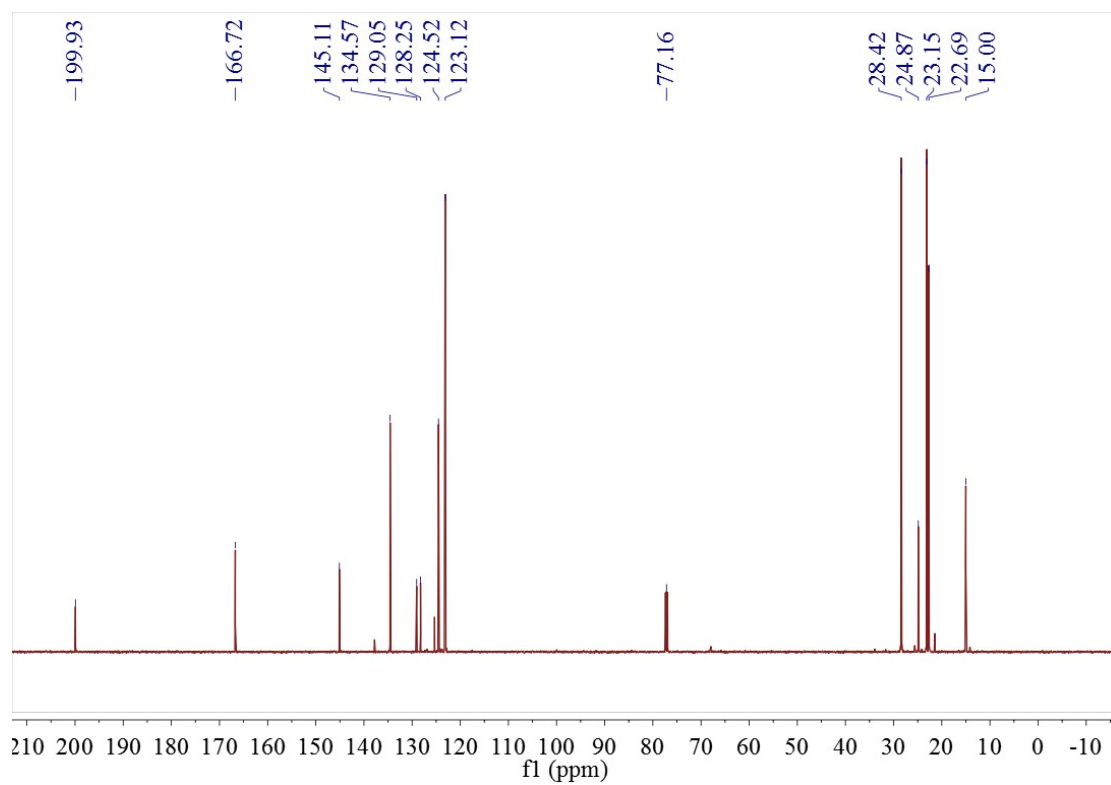

**Figure S6.**  $^{13}\text{C}$  NMR (100.6 MHz  $\text{CDCl}_3$  298K) spectrum for ligand  $\text{L}^{\text{iPr-NO}}$ .

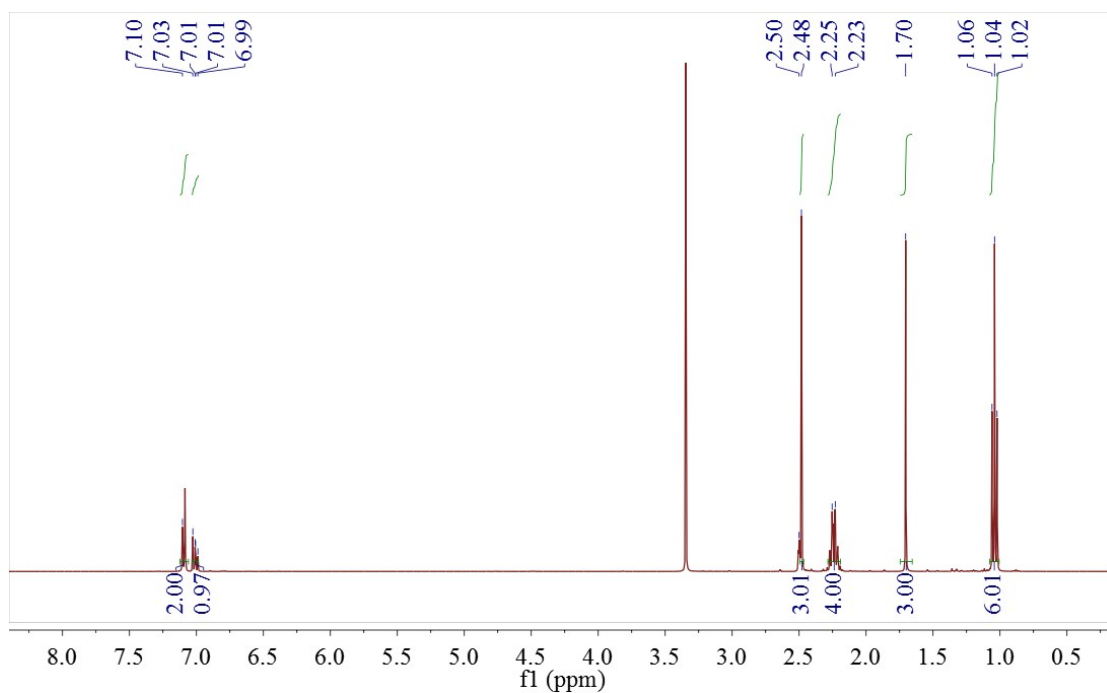

**Fig**

**ure S7.**  $^1\text{H}$  NMR (400 MHz DMSO 298K) spectrum for ligand  $\text{L}^{\text{Et-NO}}$ .

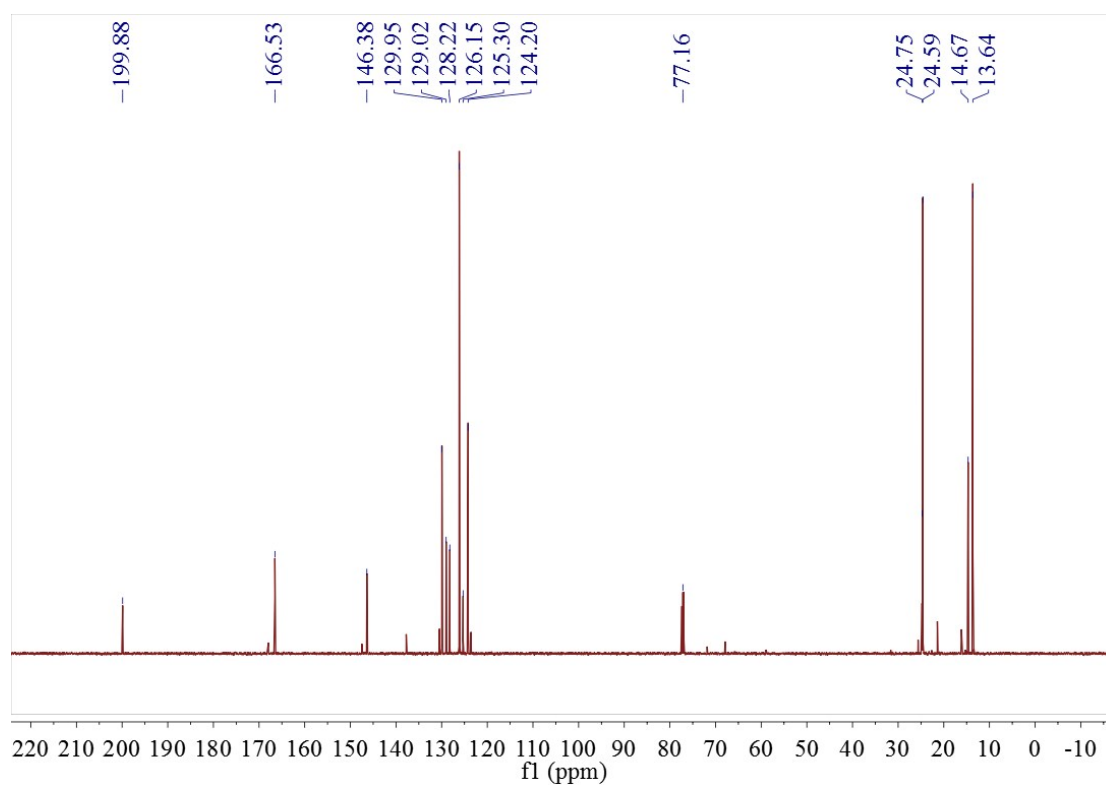

**Figure S8.**  $^{13}\text{C}$  NMR (100.6 MHz  $\text{CDCl}_3$  298K) spectrum for ligand  $\text{L}^{\text{Et-NO}}$ .

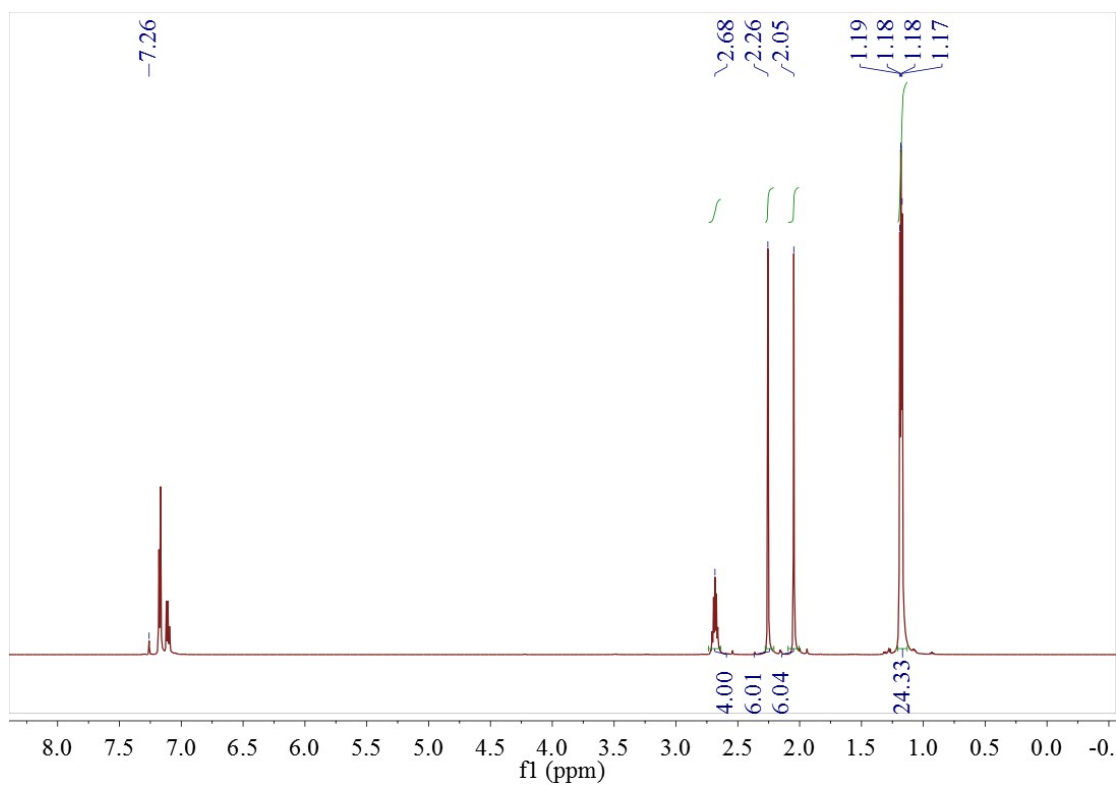

**Fig**

**ure S9.**  $^1\text{H}$  NMR (400 MHz  $\text{CDCl}_3$  298K) spectrum for ligand  $\text{L}^{\text{ipr-N}_4}$ .

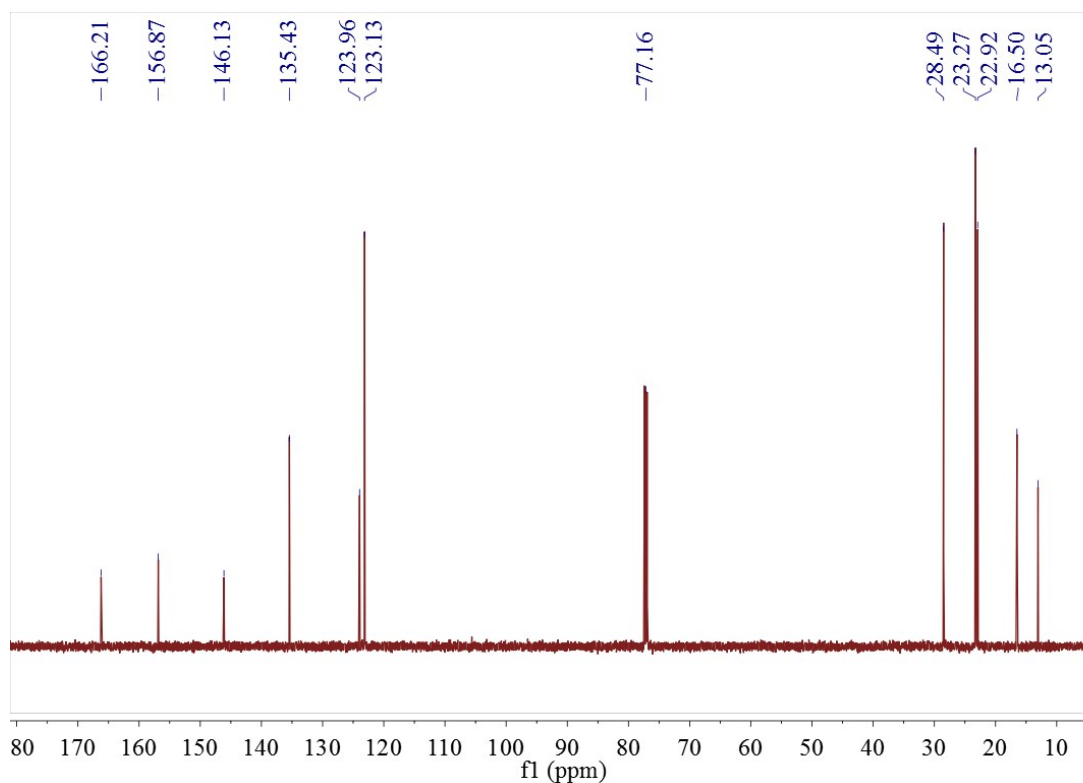

**Figure S10.**  $^{13}\text{C}$  NMR (100.6 MHz  $\text{CDCl}_3$  298K) spectrum for ligand  $\text{L}^{\text{ipr-N}_4}$ .

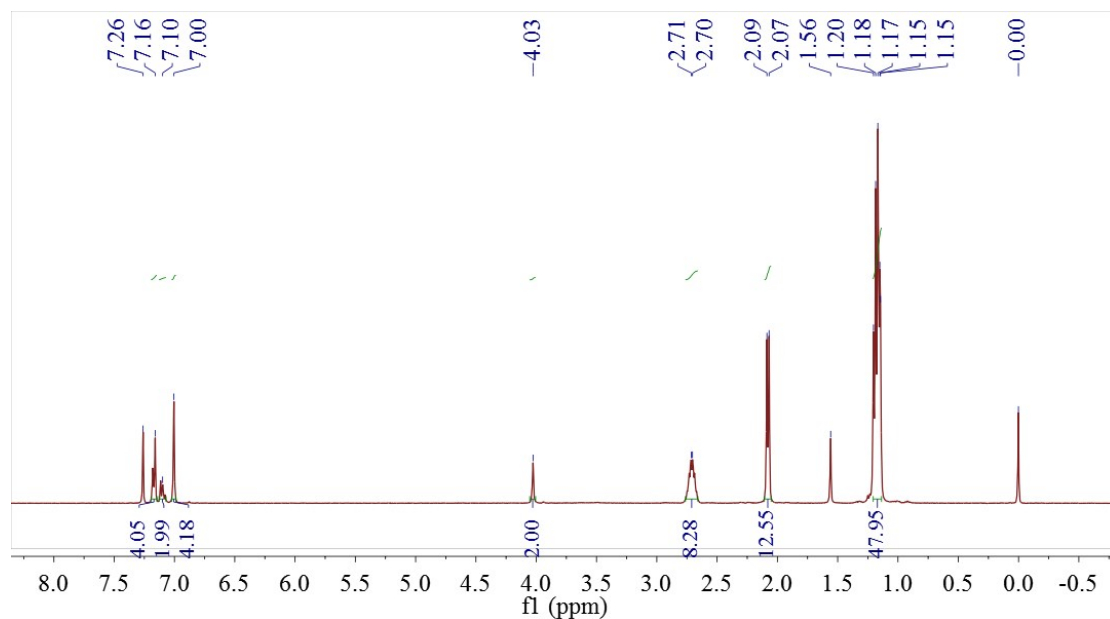

**Figure S11.**  $^1\text{H}$  NMR (400 MHz  $\text{CDCl}_3$  298K) spectrum for ligand  $\text{L}^{\text{iPr-N}_2\text{-ArCH}_2\text{Ar-N}_2}$

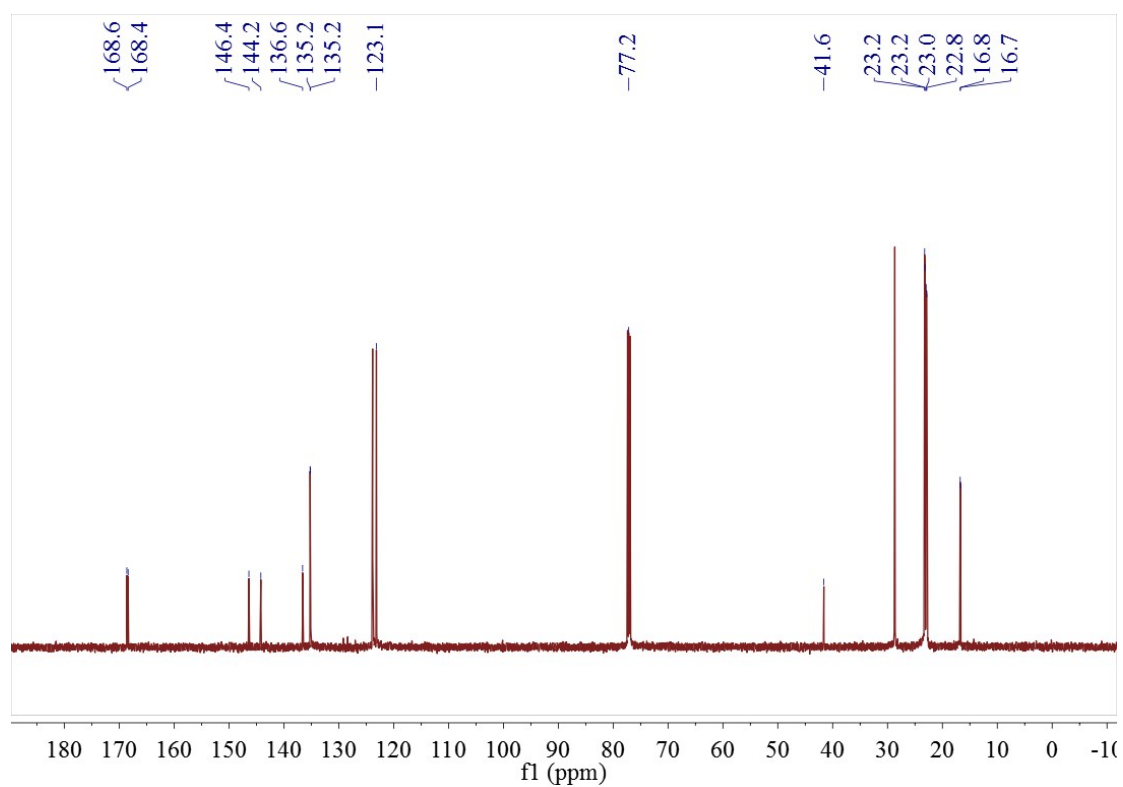

**Figure S12.**  $^{13}\text{C}$  NMR (100.6 MHz  $\text{CDCl}_3$  298K) spectrum for ligand  $\text{L}^{\text{iPr-N}_2\text{-ArCH}_2\text{Ar-N}_2}$

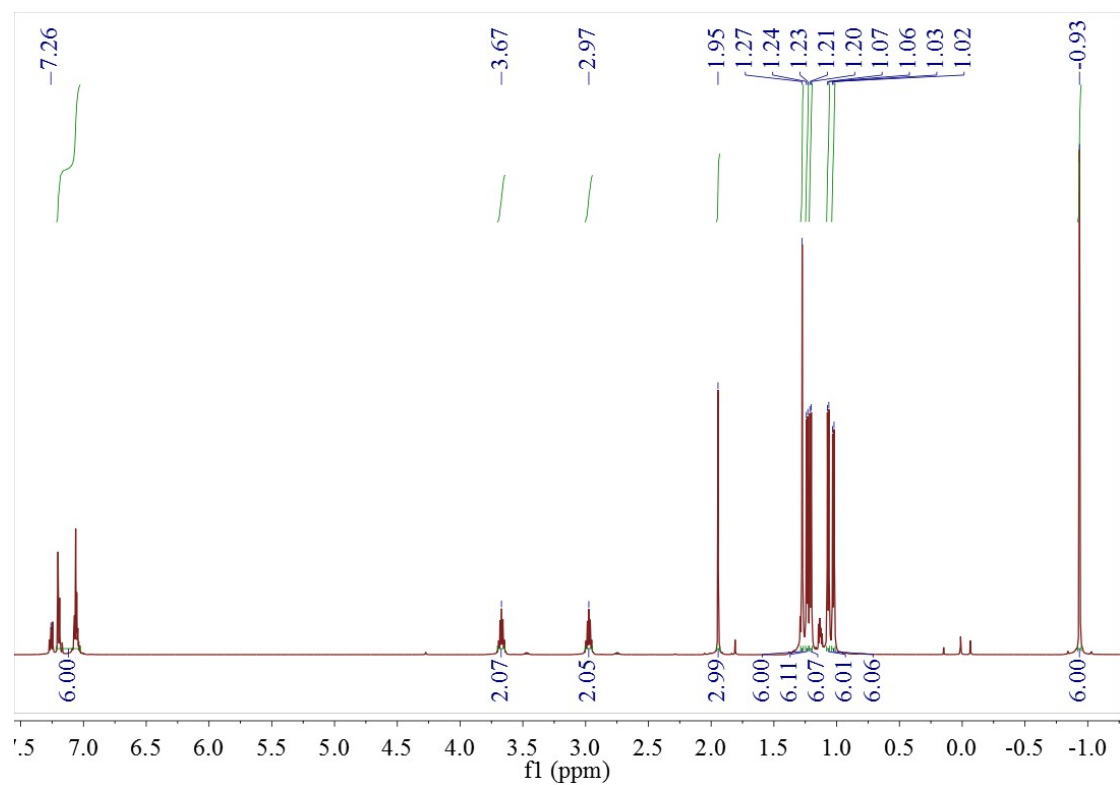

**ure S13.**  $^1\text{H}$  NMR (400 MHz  $\text{CDCl}_3$  298K) spectrum for compound **1**.

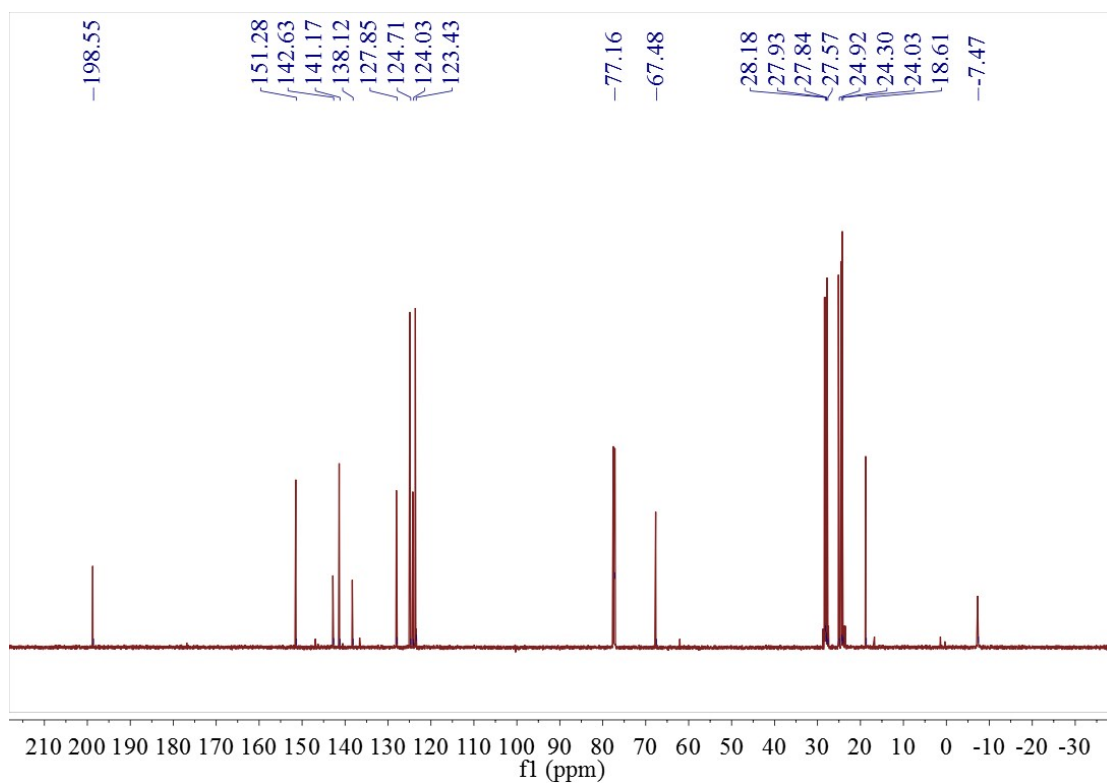

**Figure S14.**  $^{13}\text{C}$  NMR (100.6 MHz  $\text{CDCl}_3$  298K) spectrum for compound **1**.

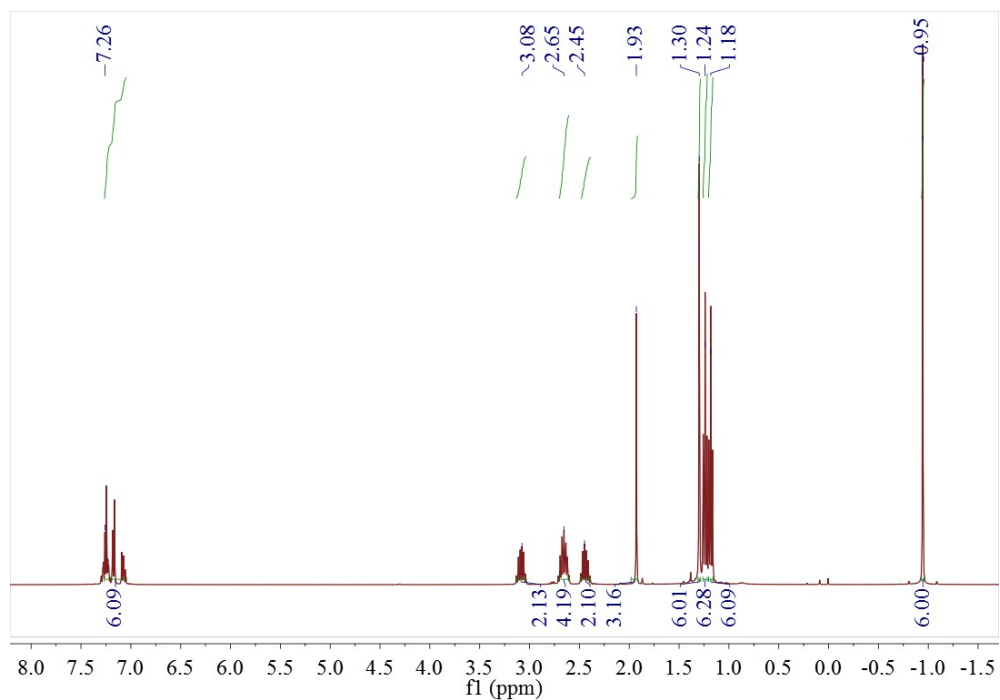

**Figure S15.**  $^1\text{H}$  NMR (400 MHz  $\text{CDCl}_3$  298K) spectrum for compound 2.

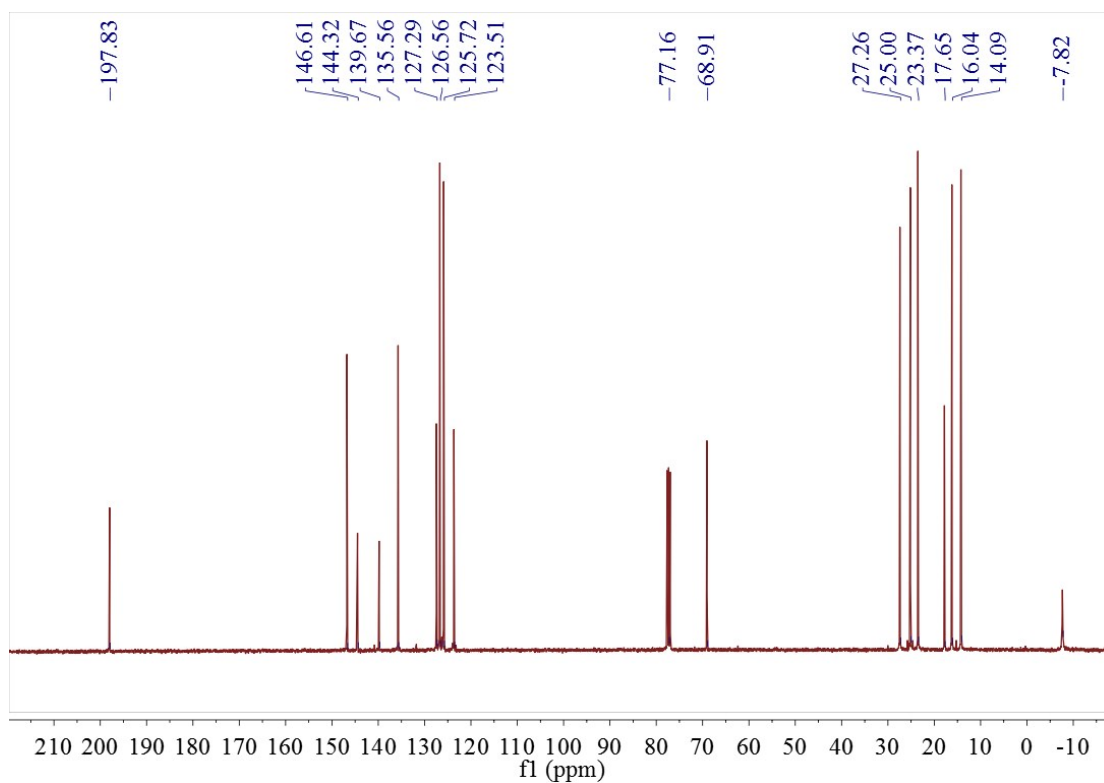

**Figure S16.**  $^{13}\text{C}$  NMR (100.6 MHz  $\text{CDCl}_3$  298K) spectrum for compound 2.

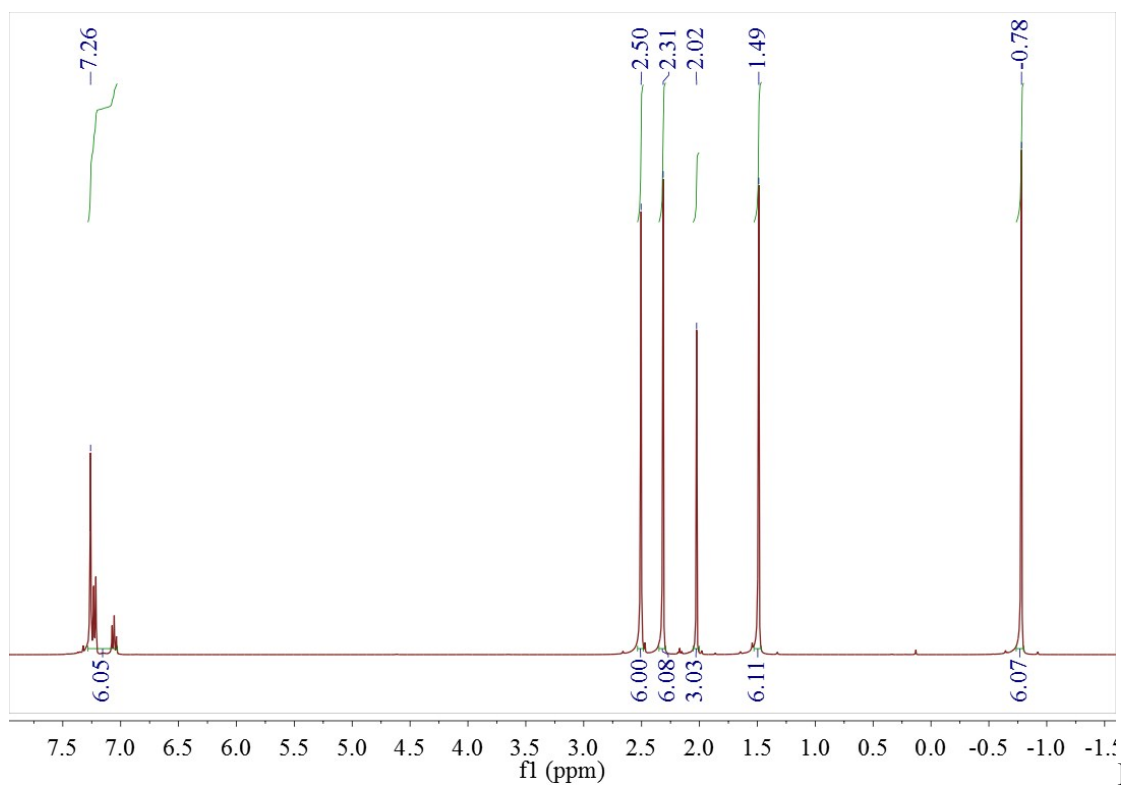

**Fig**

**ure S17.**  $^1\text{H}$  NMR (400 MHz  $\text{CDCl}_3$  298K) spectrum for compound **3**.

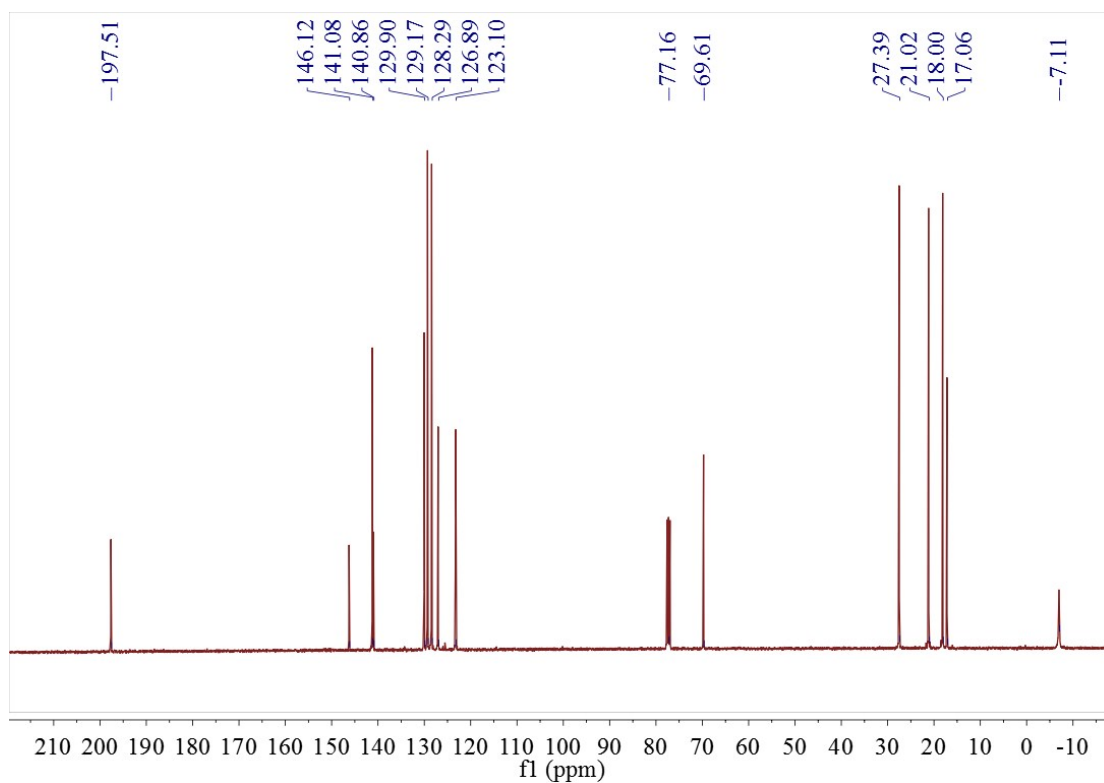

**Figure S18.**  $^{13}\text{C}$  NMR (100.6 MHz  $\text{CDCl}_3$  298K) spectrum for compound **3**.

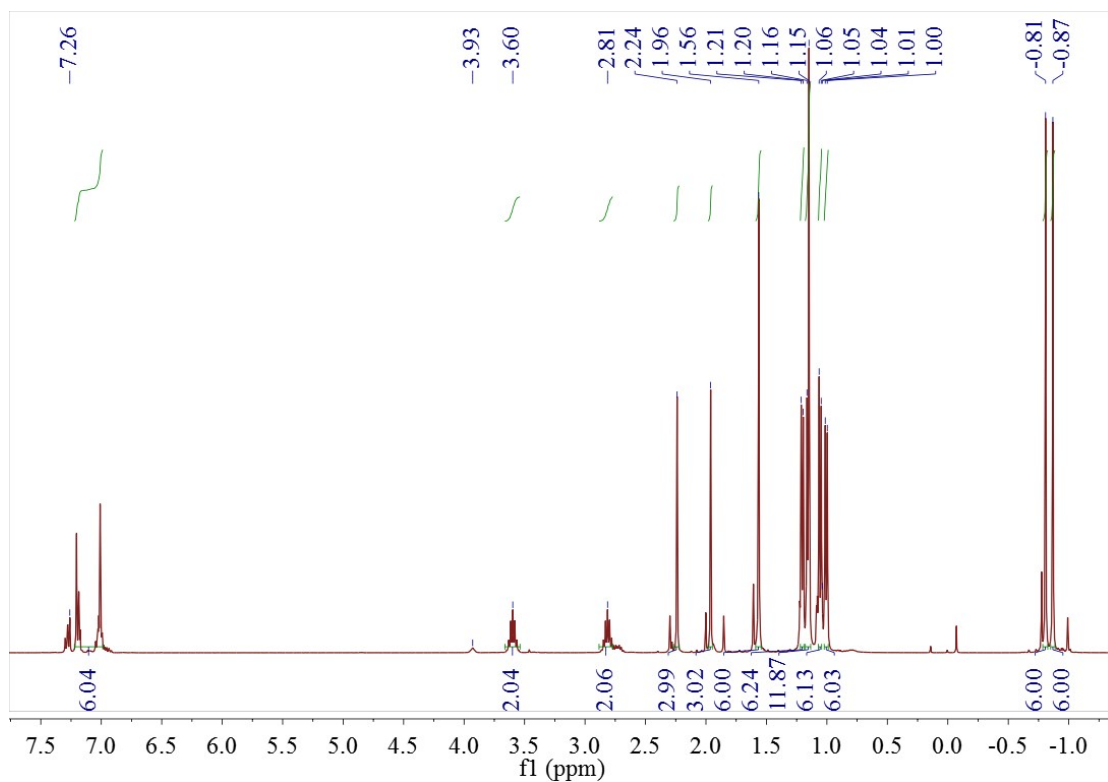

**Figure S19.**  $^1\text{H}$  NMR (400 MHz  $\text{CDCl}_3$  298K) spectrum for compound 4.

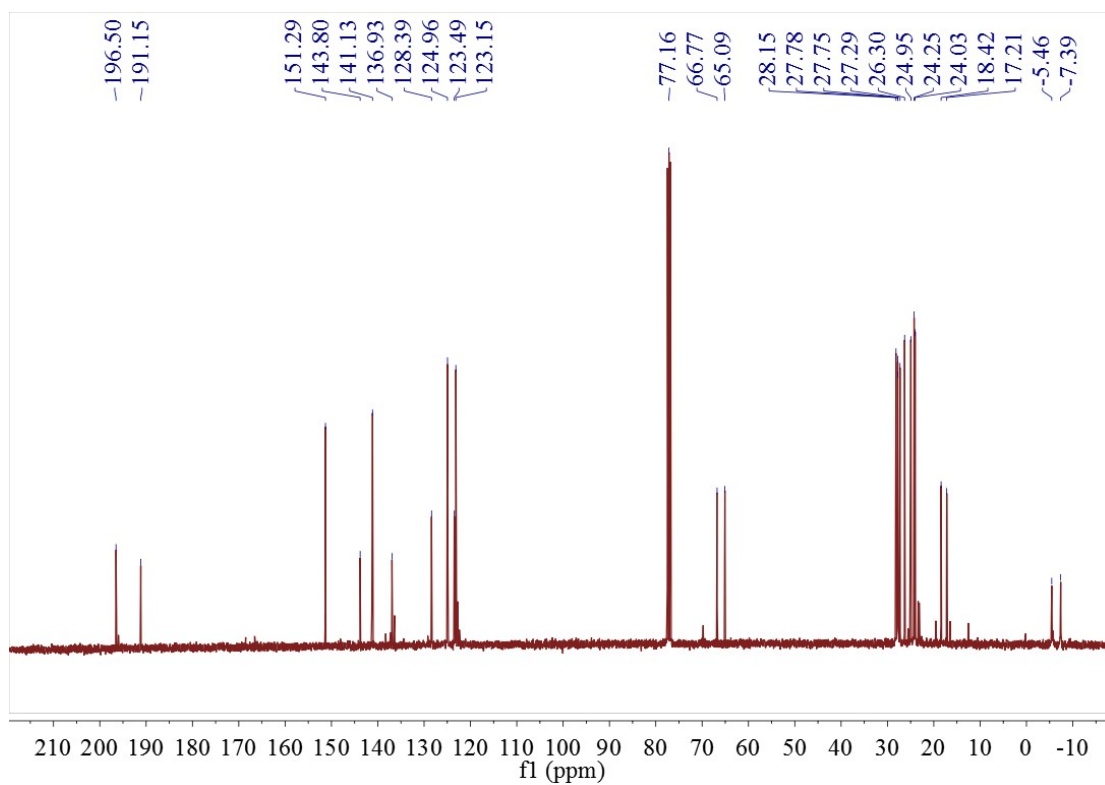

**Figure S20.**  $^{13}\text{C}$  NMR (100.6 MHz  $\text{CDCl}_3$  298K) spectrum for compound 4.

**Fig**



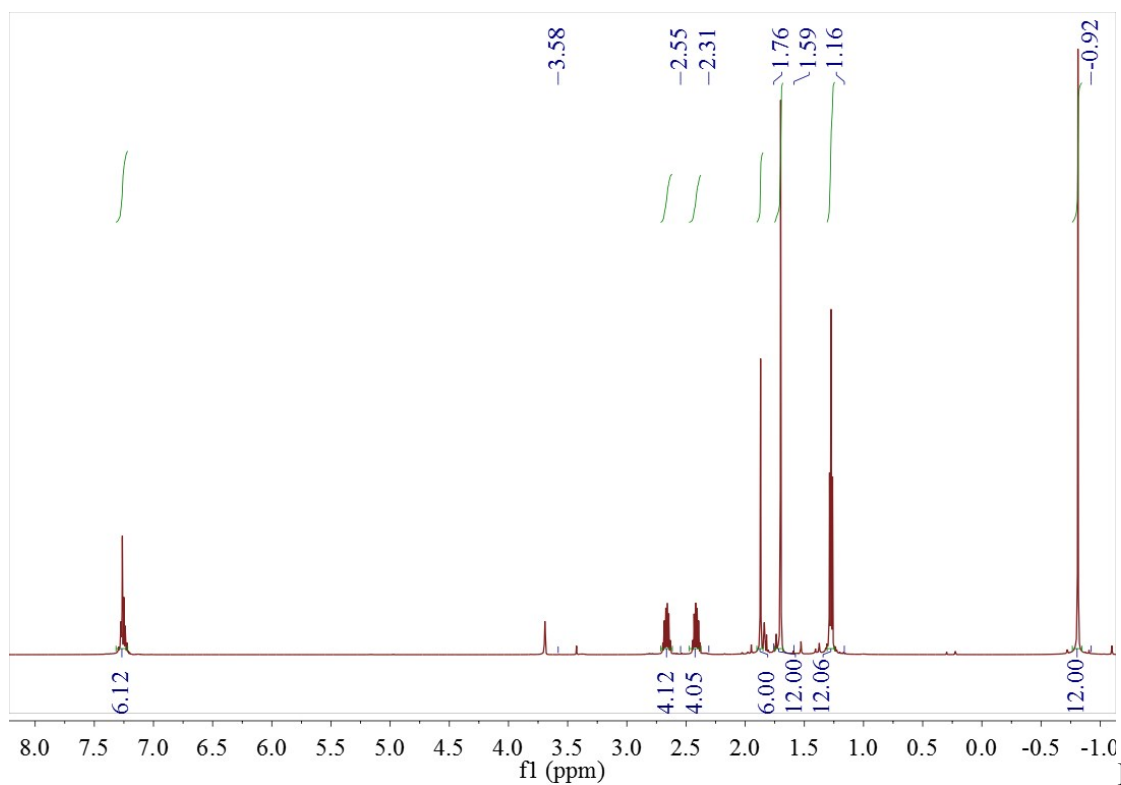

**Fig**

**Figure S21.**  $^1\text{H}$  NMR (400 MHz THF-d8 298K) spectrum for compound **5**.

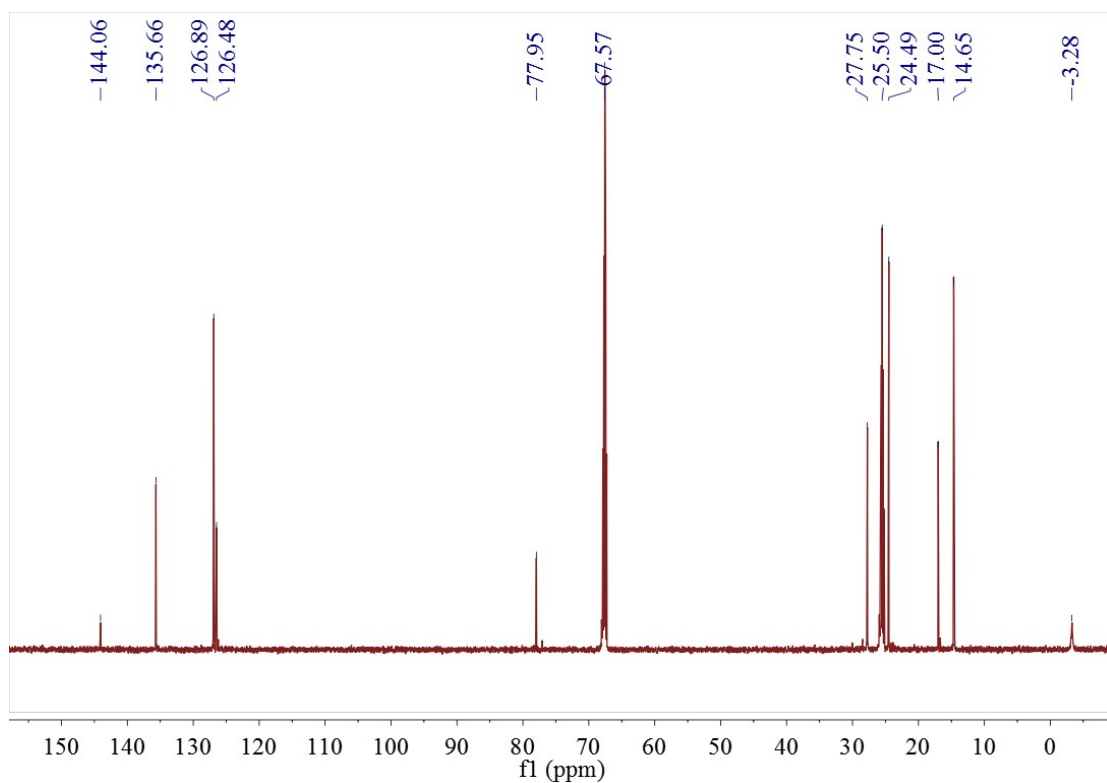

**Figure S22.**  $^{13}\text{C}$  NMR (100.6 MHz THF-d8 298K) spectrum for compound **5**.

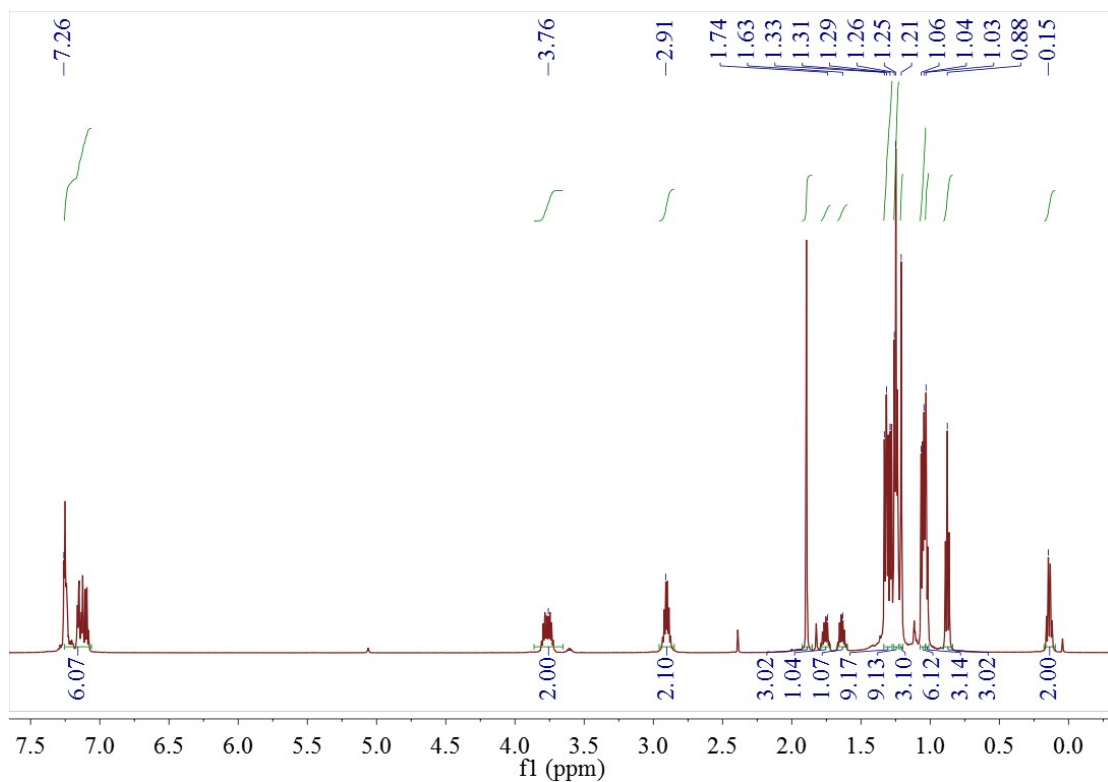

**Figure S23.**  $^1\text{H}$  NMR (400 MHz  $\text{CDCl}_3$  298K) spectrum for compound **6**.

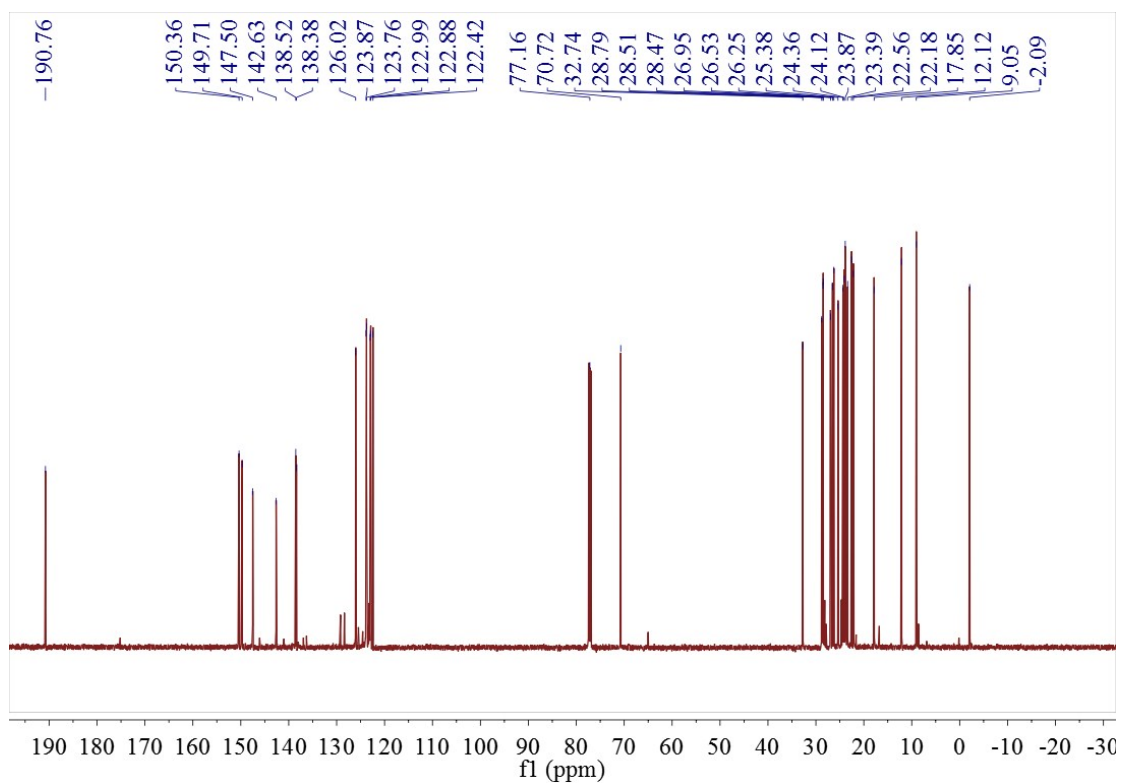

**Figure S24.**  $^{13}\text{C}$  NMR (100.6 MHz  $\text{CDCl}_3$  298K) spectrum for compound **6**.

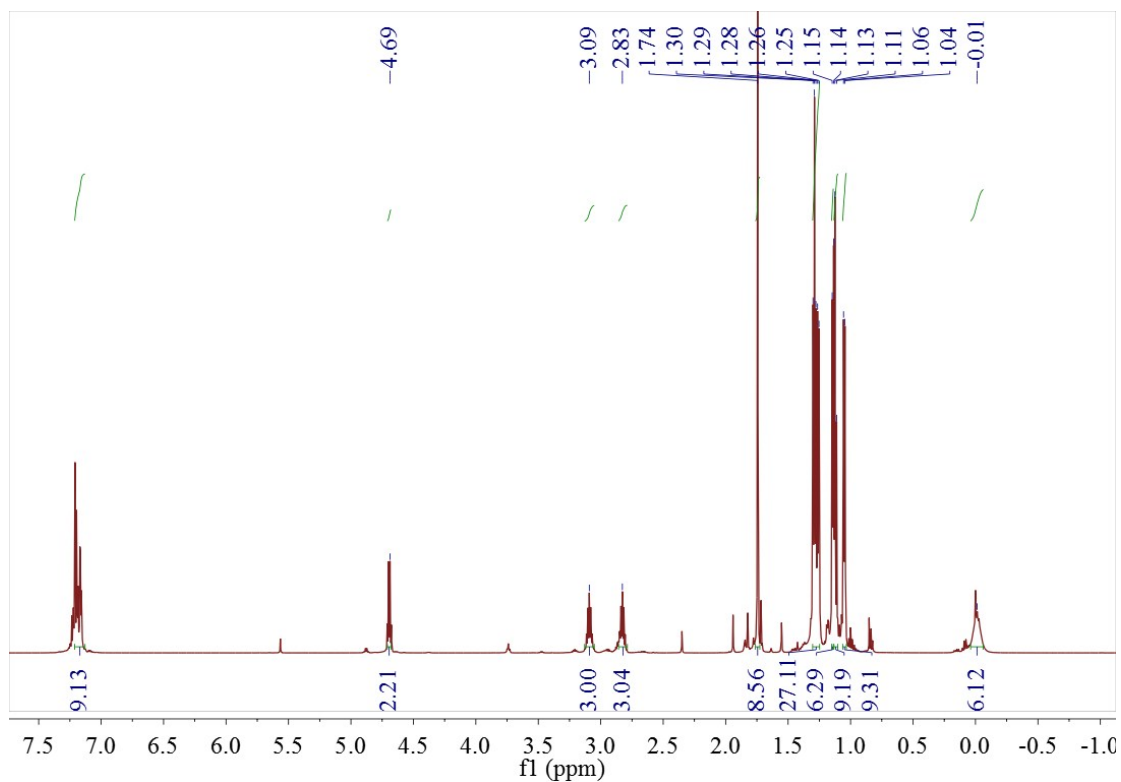

Figure S25.  $^1\text{H}$  NMR (400 MHz  $\text{CDCl}_3$  298K) spectrum for compound 7.

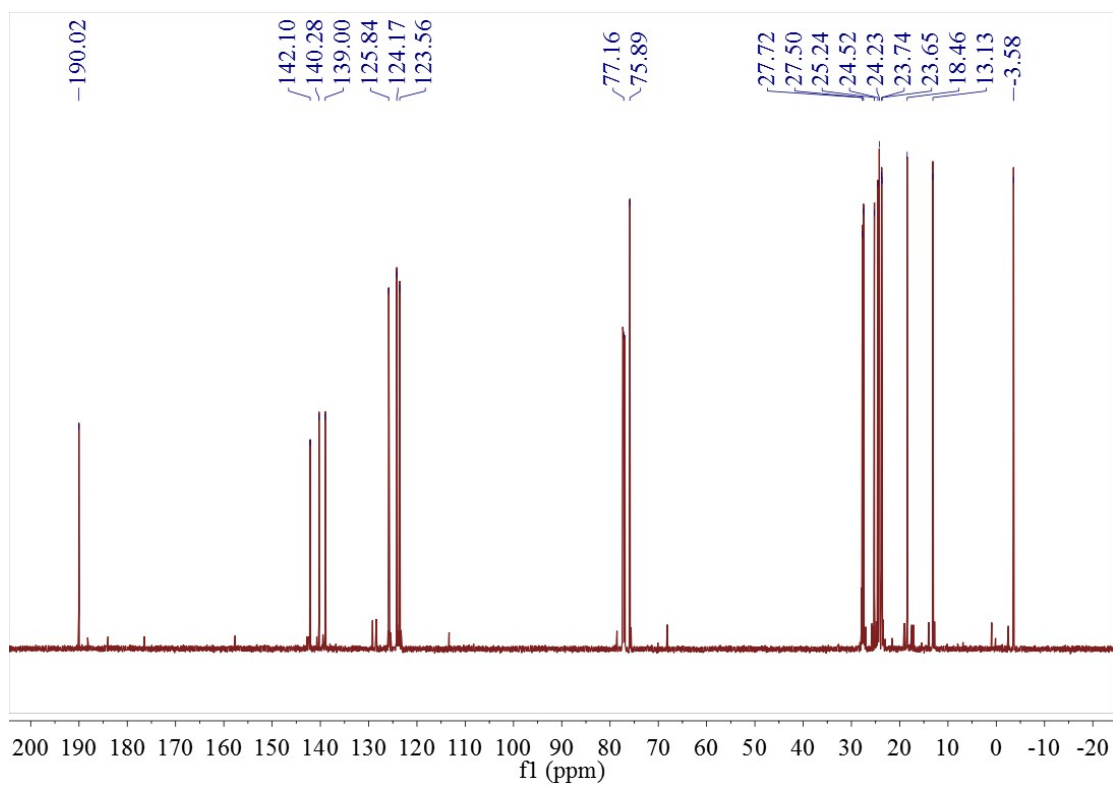

Figure S26.  $^{13}\text{C}$  NMR (100.6 MHz  $\text{CDCl}_3$  298K) spectrum for compound 7.

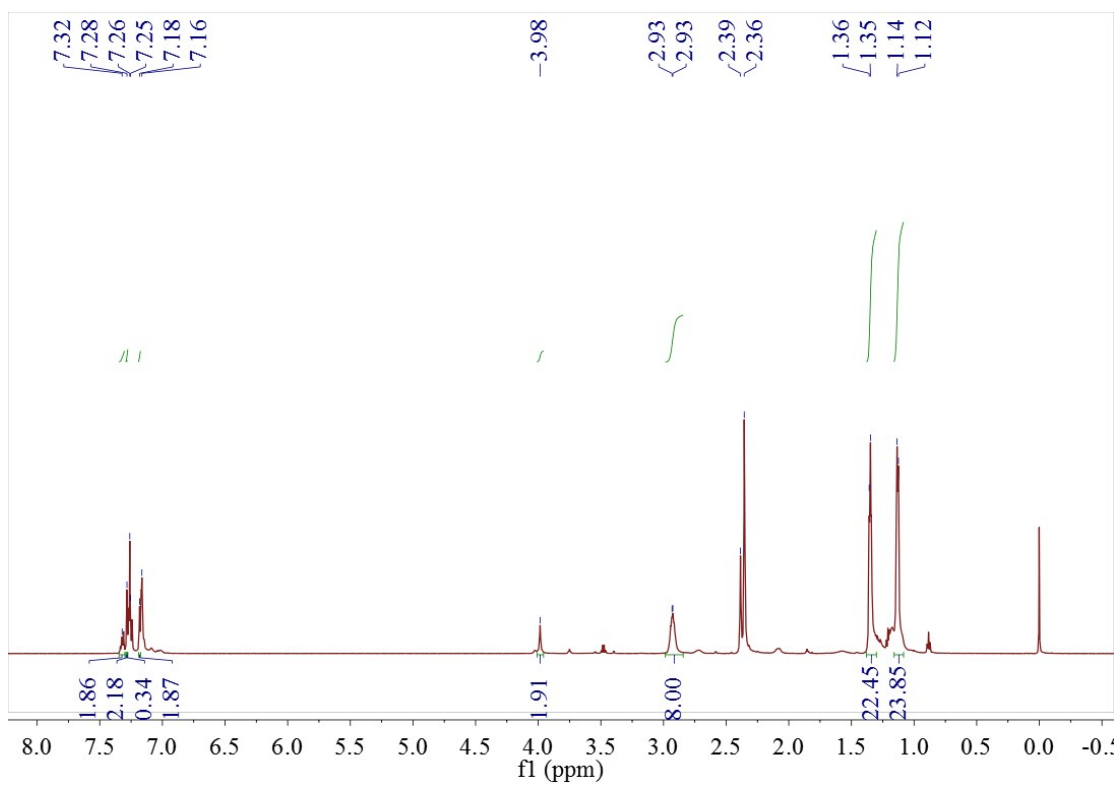

**Figure S27.**  $^1\text{H}$  NMR (400 MHz  $\text{CDCl}_3$  298K) spectrum for compound **8**.

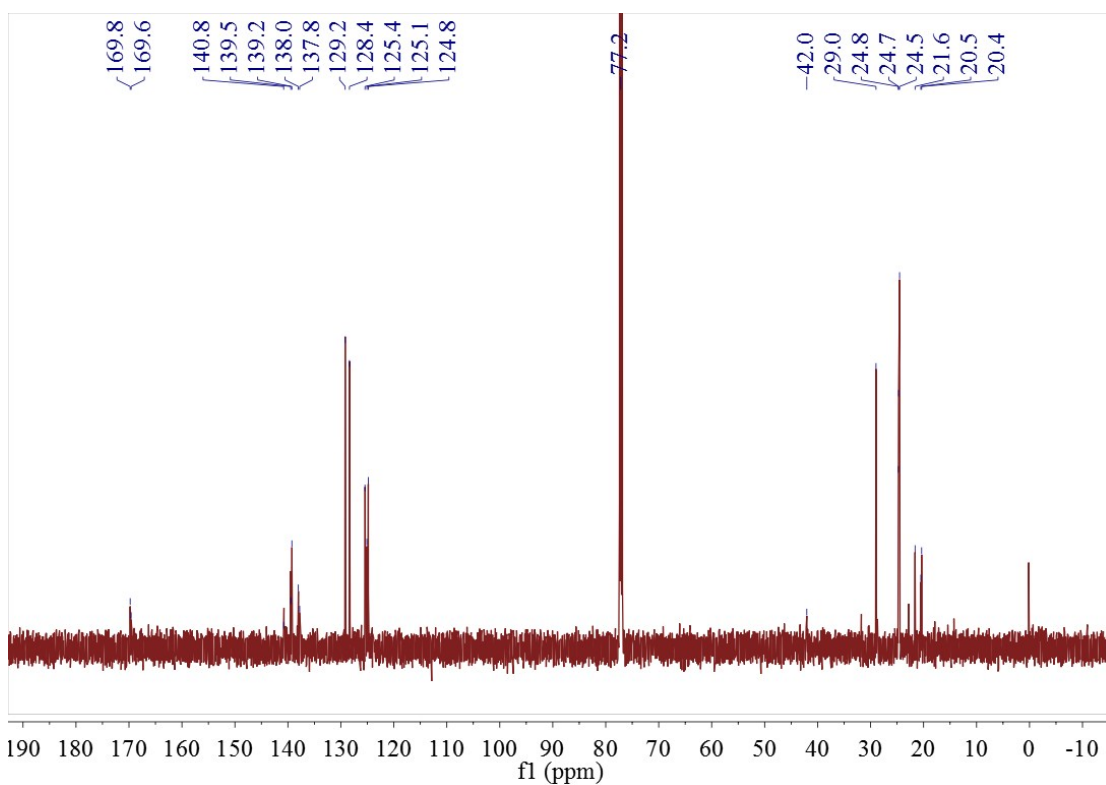

**Figure S28.**  $^{13}\text{C}$  NMR (100.6 MHz  $\text{CDCl}_3$  298K) spectrum for compound **8**.

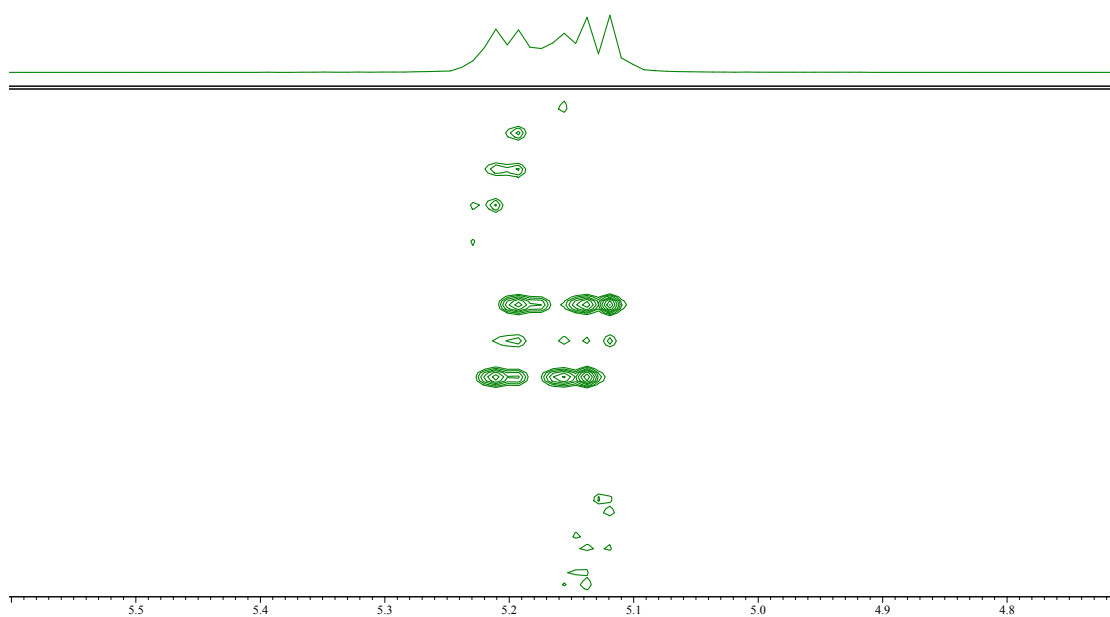

**Figure S29.** 2D J-resolved <sup>1</sup>H NMR (CDCl<sub>3</sub>, 400 MHz, 298 K) spectrum of the PLA synthesized with **6** at 80 °C (table 6, entry 2).

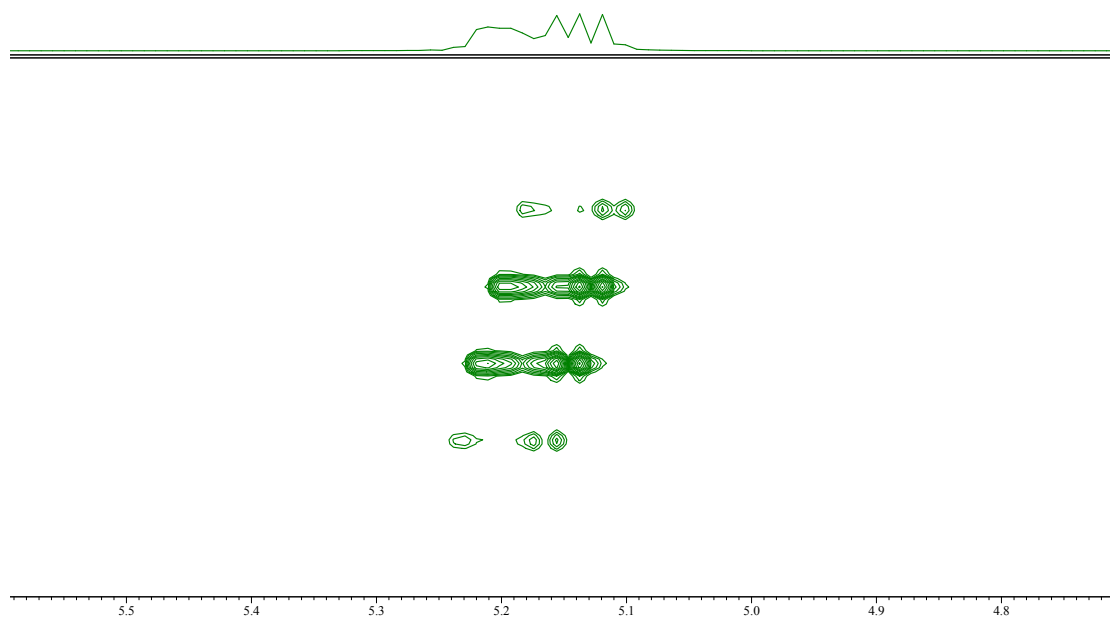

**Figure S30.** 2D J-resolved <sup>1</sup>H NMR (CDCl<sub>3</sub>, 400 MHz, 298 K) spectrum of the PLA synthesized with **7** at 30 °C (table 6, entry 3).

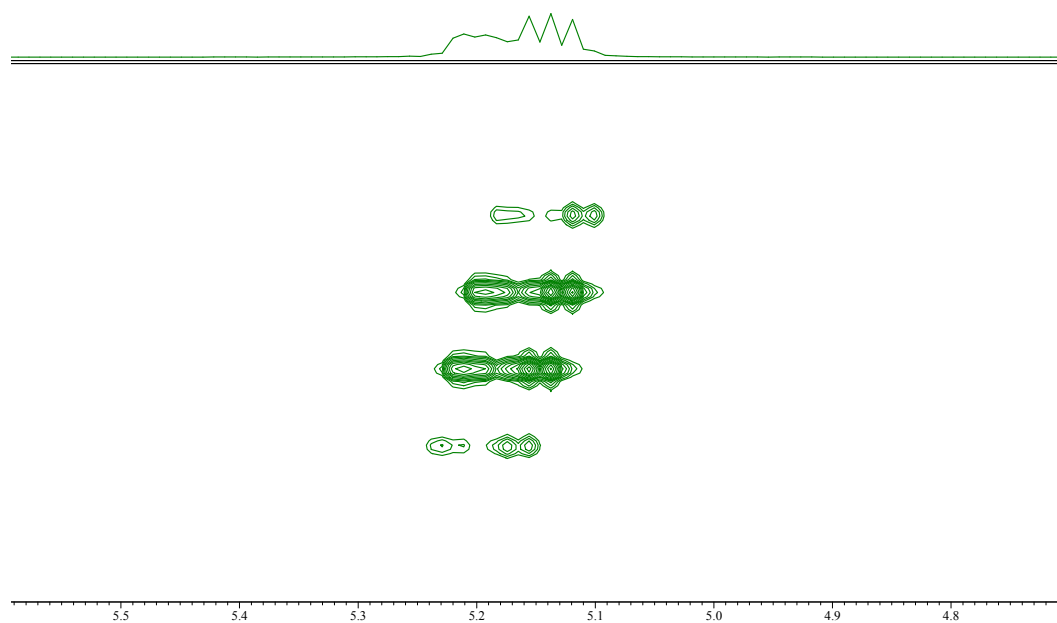

**Figure S31.** 2D J-resolved  $^1\text{H}$  NMR ( $\text{CDCl}_3$ , 400 MHz, 298 K) spectrum of the PLA synthesized with **7** at 80  $^\circ\text{C}$  (table 6, entry 4).

## References

- [1] (a) H. -K. Luo and H. Schumann, *J. Mol. Cat. A: Chem.* 2005, **227**, 153–161; (b) S. Jie, D. Zhang, T. Zhang, W. -H. Sun, J. Chen, Q. Ren, D. Liu, G. Zheng and W. Chen, *J. Organomet. Chem.* 2005, **690**, 1739–1749; (c) J. D. A. Pelletier, J. Fawcett, K. Singh and G. A. Solan, *J. Organomet. Chem.* 2008, **693**, 2723–2731; (d) S. Kong, K. Song, T. Liang, C. -Y. Guo, W. -H. Sun and C. Redshaw, *Dalton Trans.* 2013, **42**, 9176–9187; (e) L. Zhu, Z. -S. Fu, H. -J. Pan, W. Feng, C. Chen and Z. -Q. Fan, *Dalton Trans.* 2014, **43**, 2900–2906; (f) Q. Xing, K. Song, T. Liang, Q. Liu, W. -H. Sun and C. Redshaw, *Dalton Trans.* 2014, **43**, 7830–7837.
- [2] A. D. Becke, *J. Chem. Phys.*, 1993, **98**, 5648–5652.
- [3] C. Lee, W. Yang and R. G. Parr, *Phys. Rev. B.*, 1988, **37**, 785–789.
- [4] Gaussian 09, Revision C.1, M. J. Frisch, G. W. Trucks, H. B. Schlegel, G. E. Scuseria, M. A. Robb, J. R. Cheeseman, G. Scalmani, V. Barone, B. Mennucci, G. A. Petersson, H. Nakatsuji, M. Caricato, X. Li, H. P. Hratchian, A. F. Izmaylov, J. Bloino, G. Zheng, J. L. Sonnenberg, M. Hada, M. Ehara,; K. Toyota, R. Fukuda, J. Hasegawa, M. Ishida, T. Nakajima, Y. Honda, O. Kitao, H. Nakai, T. Vreven, Jr., J. A. Montgomery, J. E. Peralta, F. Ogliaro, M. Bearpark, J. J. Heyd, E. Brothers, K. N. Kudin, V. N. Staroverov, R. Kobayashi, J. Normand, K. Raghavachari, A. Rendell, J. C. Burant, S. S. Iyengar, J. Tomasi, M. Cossi, N. Rega, J. M. Millam, M. Klene, J. E. Knox, J. B. Cross, V. Bakken, C. Adamo, J. Jaramillo, R. Gomperts, R. E. Stratmann, O. Yazyev, A. J. Austin, R. Cammi, C. Pomelli, J. W. Ochterski, R. L. Martin, K. Morokuma, V. G. Zakrzewski, G. A. Voth, P. Salvador, J. J. Dannenberg, S. Dapprich, A. D. Daniels, Ö. Farkas, J. B. Foresman, J. V. Ortiz, J. Cioslowski and D. J. Fox, Gaussian, Inc., Wallingford CT, 2009.
